# Supplementary material
Source: PubMed Central journal article supplement (PMC7455063)
Supplement: jciinsight-5-134508-s046.pdf [file jciinsight-5-134508-s046.pdf]

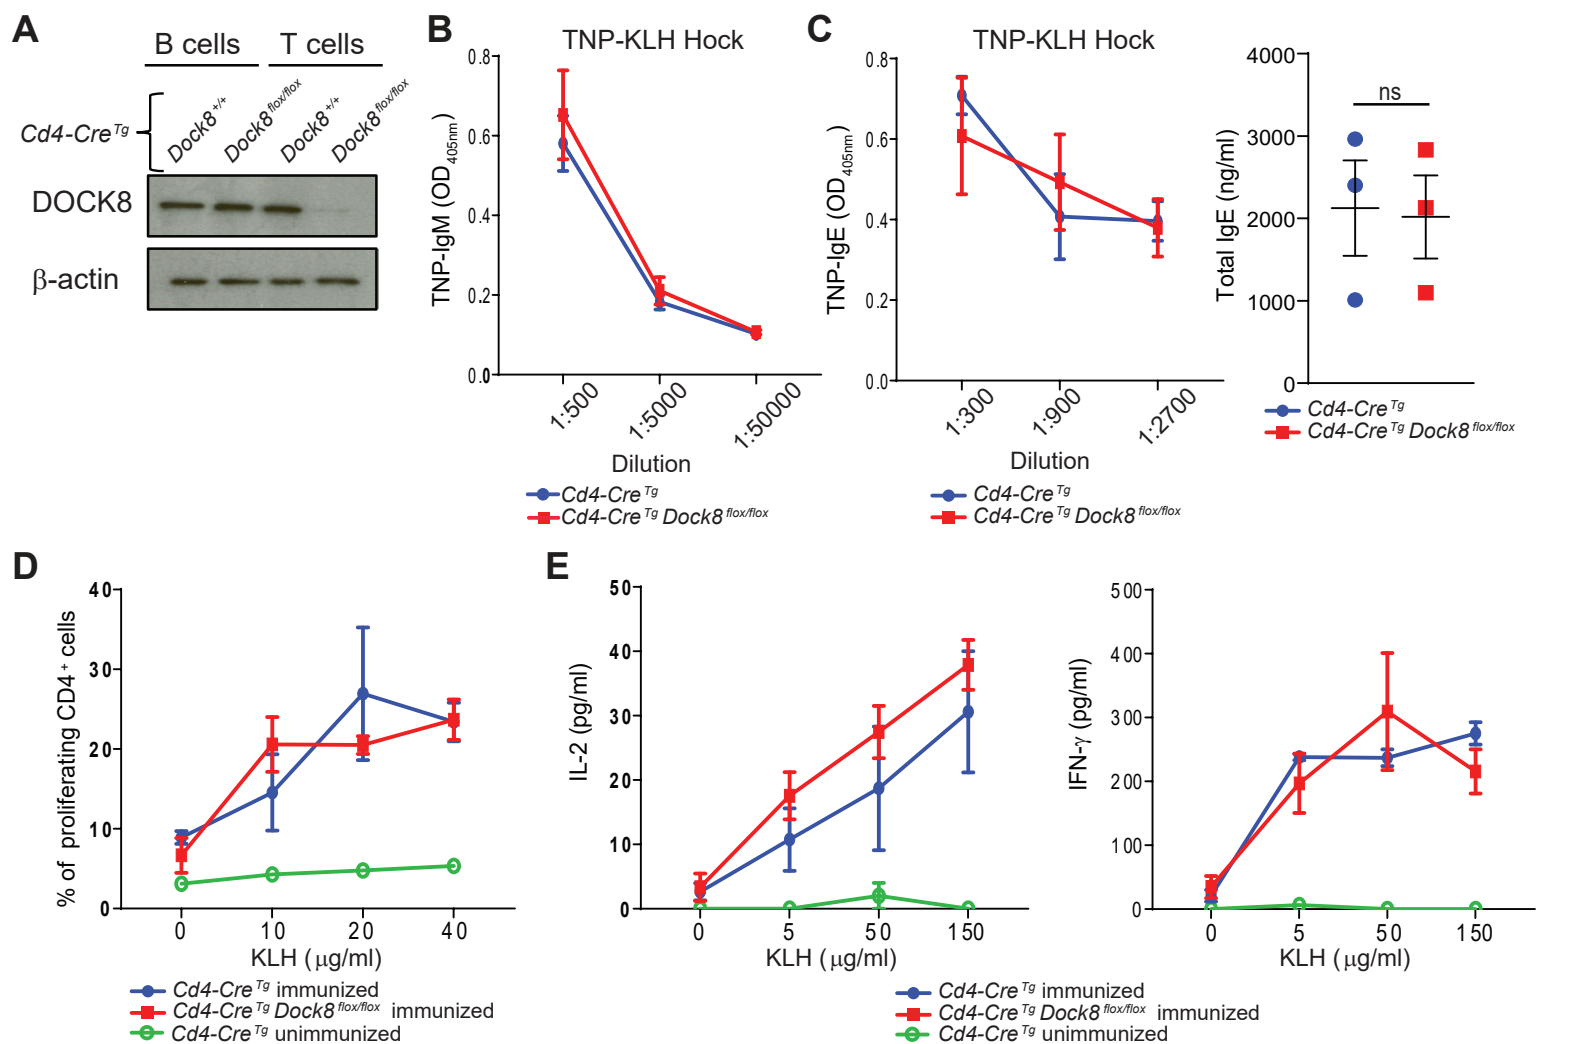

**Supplemental Figure 1. *Cd4-Cre<sup>Tg</sup>Dock8<sup>flx/flx</sup>* mice have total and antigen-specific serum IgE levels, antigen-driven T cell proliferation, and cytokine secretion comparable to controls. A.** Immunoblots of purified B and T cell lysates from *Cd4-Cre<sup>Tg</sup>Dock8<sup>flx/flx</sup>* and controls. Lysates were immunoblotted for DOCK8 and  $\beta$ -actin for protein loading. **B-E.** *Cd4-Cre<sup>Tg</sup>Dock8<sup>flx/flx</sup>* mice and controls were immunized with TNP-KLH in the bilateral hocks on day 0 and 14. Serum was obtained and draining LNs were harvested on day 21 and cultured with KLH antigen *in vitro*. **B.** Serum TNP-specific IgM. **C.** Serum TNP-specific IgE (left) and total IgE levels (right). **D.** CD4<sup>+</sup> T cell proliferation measured by Cell Trace Violet dilution. **E.** IL-2 (left) and INF- $\gamma$  (right) secretion in culture supernatants by T cells. The graphs in B-E shows data from one representative experiment out of two. n=3-5 mice/group. Data in B-E are presented as mean $\pm$ SEM.

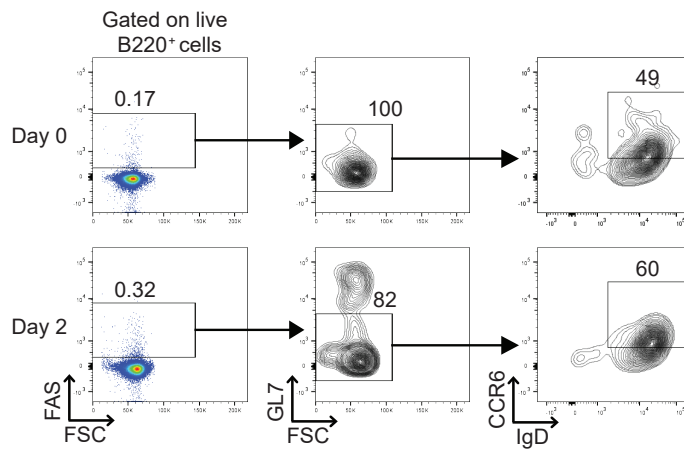

**Supplemental Figure 2. Gating strategy for examining pre-GC B cells.** *Cd4-Cre<sup>Tg</sup>Dock8<sup>fllox/fllox</sup>* and control mice were immunized in the hocks with TNP-KLH. Draining LNs were examined by flow cytometry. The gating strategy for examining pre-GC B cells pre-immunization (day 0) and on day 2 are illustrated above.

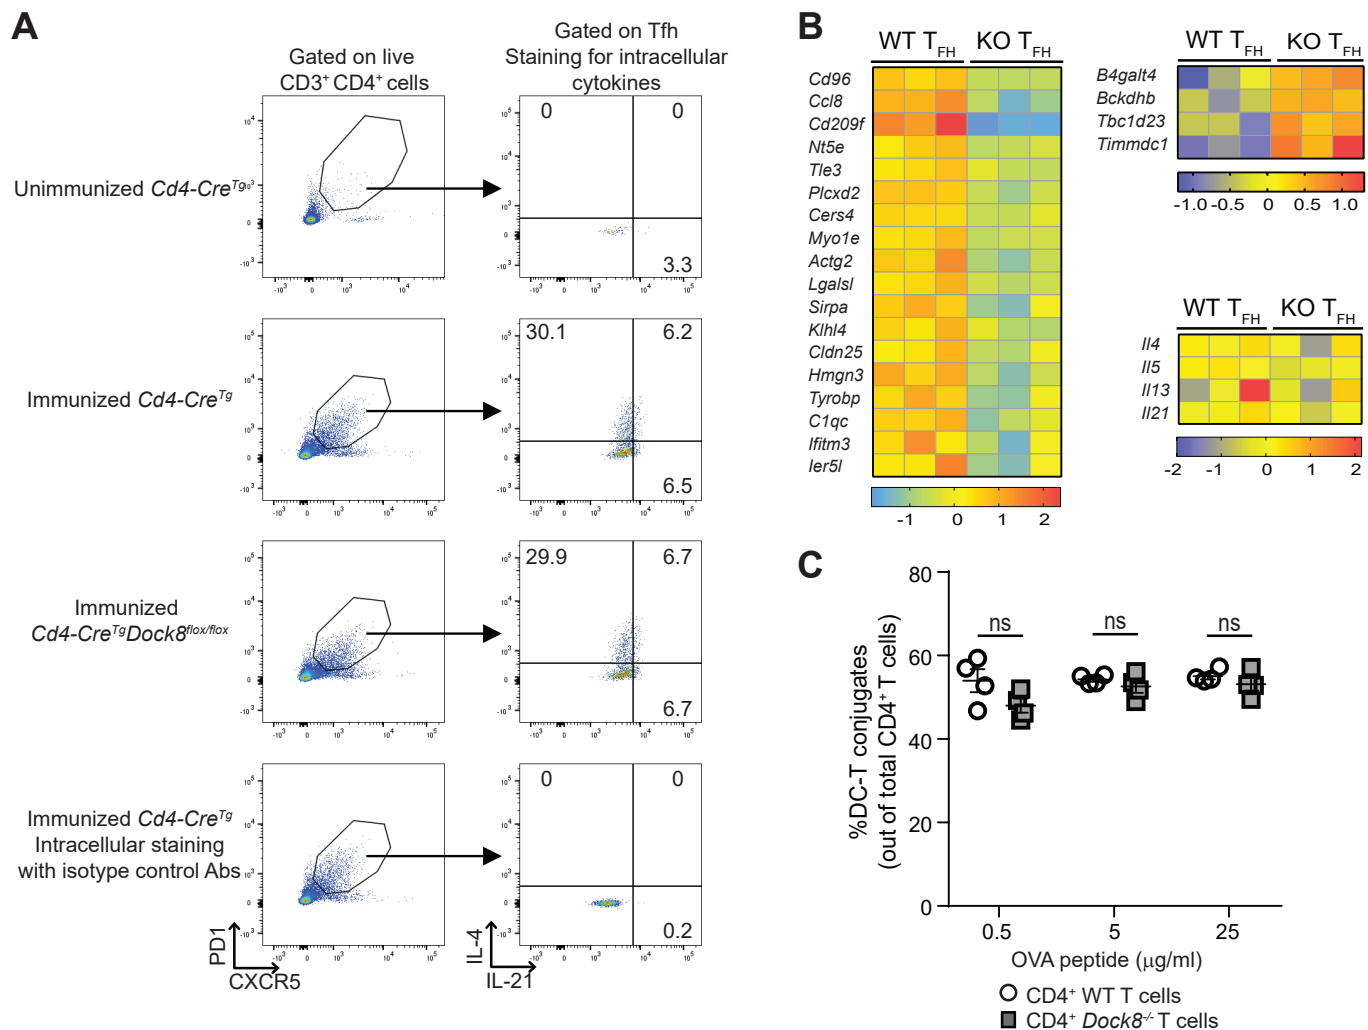

**Supplemental Figure 3. Examination of Tfh cytokine and gene expression and DC-T cell conjugate formation.** **A.** *Cd4-Cre<sup>Tg</sup>Dock8<sup>flox/flox</sup>* mice and controls were immunized with TNP-KLH in the hock. Draining LNs were harvested 7 days after immunization. Isolated lymphocytes were stimulated for 4 hours with phorbol-12,13-dibutyrate and ionomycin before extracellular staining, permeabilization, and staining for intracellular IL-4 and IL-21. Representative flow cytometry plots are shown. An unimmunized *Cd4-Cre<sup>Tg</sup>* control (top panel), an immunized *Cd4-Cre<sup>Tg</sup>* control and a *Cd4-Cre<sup>Tg</sup>Dock8<sup>flox/flox</sup>* mouse (middle panels), and an immunized *Cd4-Cre<sup>Tg</sup>* control stained with isotype control antibodies (bottom panel). **B.** Heatmaps of genes differentially expressed in CD4<sup>+</sup>CD25<sup>+</sup>CXCR5<sup>+</sup>ICOS<sup>+</sup> Tfh cells from the draining LNs of *Cd4-Cre<sup>Tg</sup>Dock8<sup>flox/flox</sup>* mice and controls, 7 days after immunization with TNP-KLH in the bilateral hocks. Cutoffs: Fold of change >1.5,  $p < 0.05$  (left and top right). Heatmap of cytokine gene expression in Tfh cells from the draining LNs of immunized *Cd4-Cre<sup>Tg</sup>Dock8<sup>flox/flox</sup>* mice and *Cd4-Cre<sup>Tg</sup>* controls (bottom right). Scales show log<sub>2</sub> fold change from the geometric mean of the row. Sorted cells from three mice/group were analyzed. **C.** Percentage of T-DC conjugates out of total CD4<sup>+</sup> T cells isolated from *Dock8*<sup>-/-</sup> OTII and WT OTII mice incubated for 3 h with LPS stimulated WT bone marrow derived DCs loaded with OVA<sub>23-339</sub> (n=4 mice/group) Data are presented as mean ± SEM. t-test n.s.  $p > 0.05$

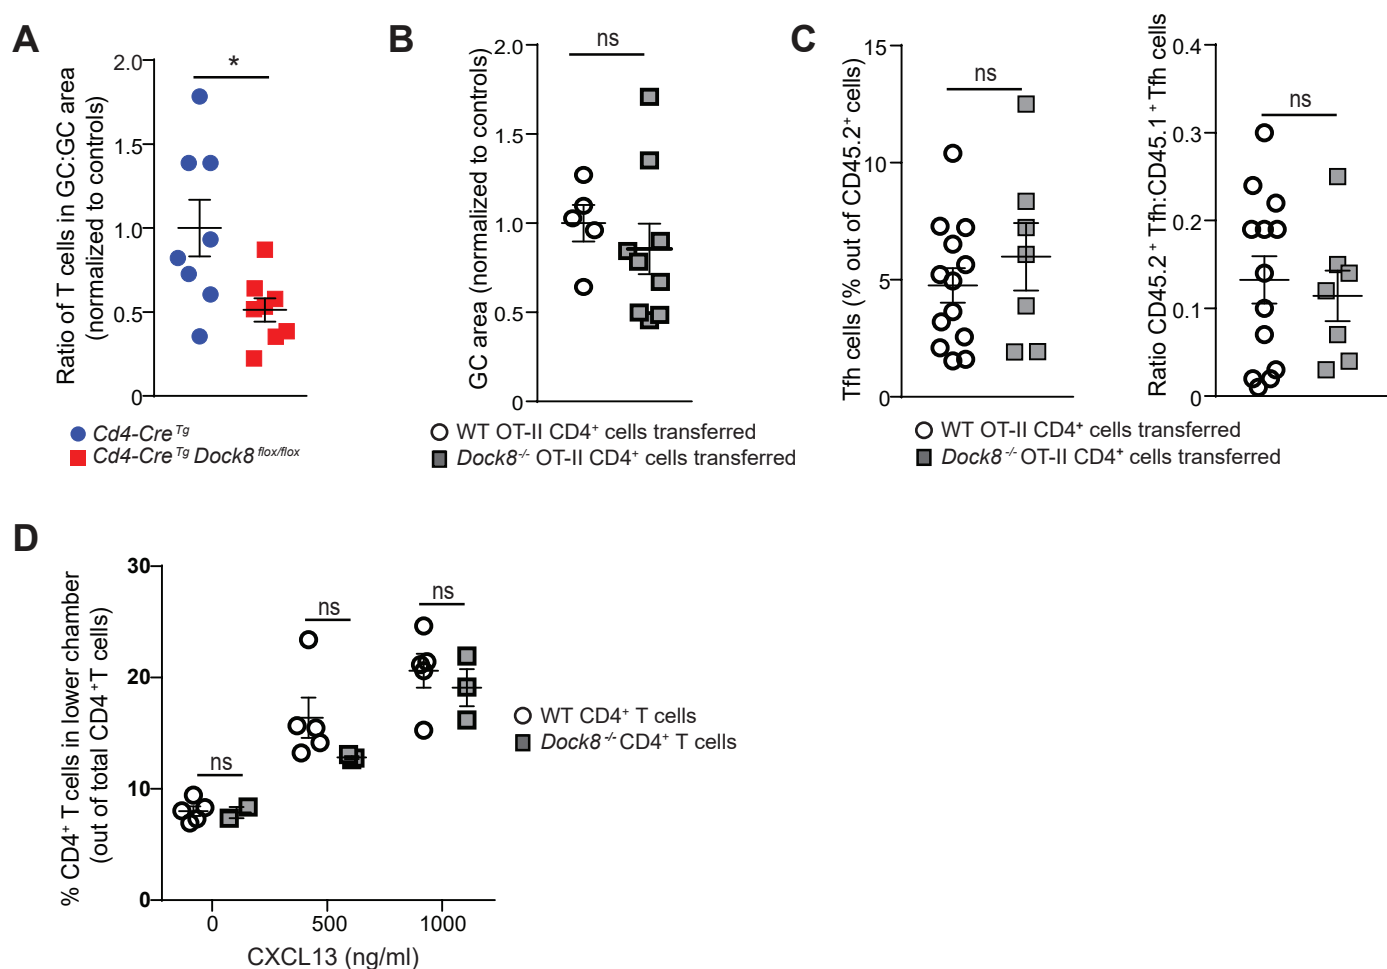

**Supplemental Figure 4. DOCK8 deficient  $CD4^+$  T cells develop into Tfh cells and have normal *in vitro* migration to CXCL13.** **A.** Draining LNs from  $Cd4-Cre^{Tg}Dock8^{flox/flox}$  and control mice immunized in the hocks with TNP-KLH on day 10. The ratio of T cells localized to the GC compared with the GC area is shown. (n=7-8 mice/group) **B-C.** WT  $CD4^+CD45.2^+$ OT-II or DOCK8 deficient T cells were adoptively transferred into  $CD45.1^+$  WT mice. Recipients were immunized with NP-OVA in the hock, and popliteal LNs were analyzed on day 9 post-immunization. (B) The GC area from immunized recipient draining LNs. (C) The percentage of  $CD4^+CXCR5^+PD1^+$  Tfh cells out of  $CD45.2^+$  T cells in the draining LNs (left). The ratio of  $CD45.2^+$  to  $CD45.1^+$  Tfh cells present in the draining LNs (right). (n=5-9 mice/group in B and n=7-13 mice/group in C) **D.** Transwell migration of WT  $CD4^+$  T cells and  $Dock8^{-/-}$   $CD4^+$  T cells from immunized OTII mice to CXCL13. (n=3-5 mice/group) Data are presented as mean $\pm$ SEM. t-test n.s.  $p>0.05$ , \* $p<0.05$ .
